# Supplementary material for: Delayed Sowing Date Improves Rice Cooking and Taste Quality by Regulating the Quantity and Quality of Grains Located on Secondary Branches
Source: MDPI journal article supplement (doi:10.3390/agronomy12061316), 2022-05-30
Supplement: s1 [file s1]

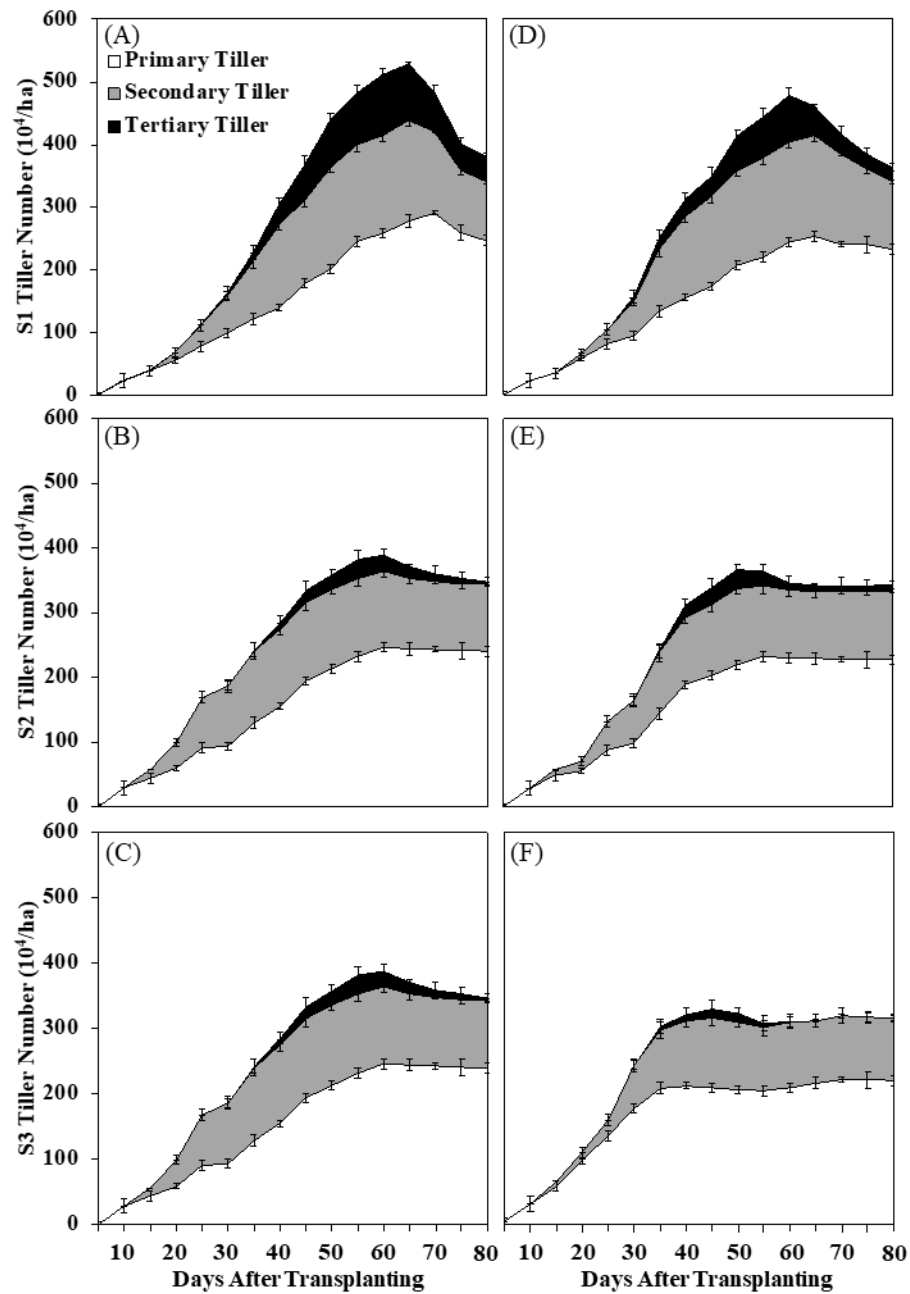

Supplementary Figure S1. Tiller dynamics in different positions of N7 (A-C) and N9108 (D-F).

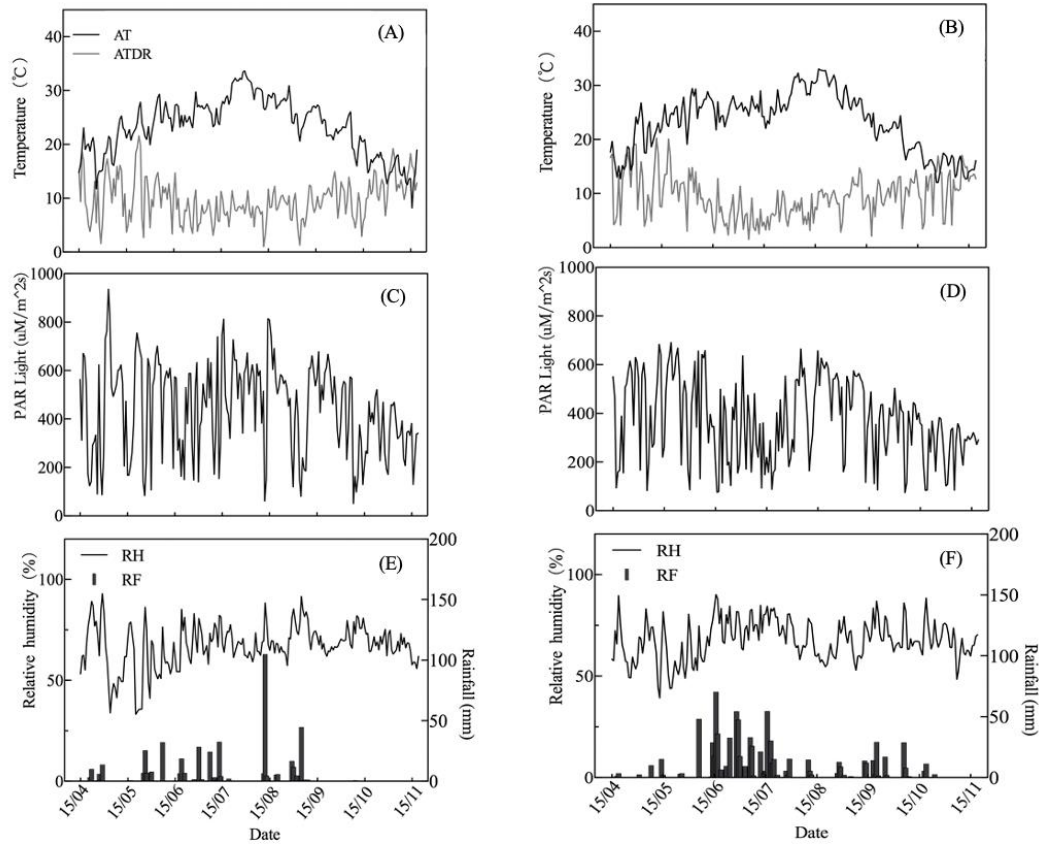

**Supplementary Figure S2.** The daily temperature (A, B), PAR (C, D), humidity and rainfall (E, F) of japonica rice in the whole growth duration of 2019 (A, C, E) and 2020 (B, D, F).

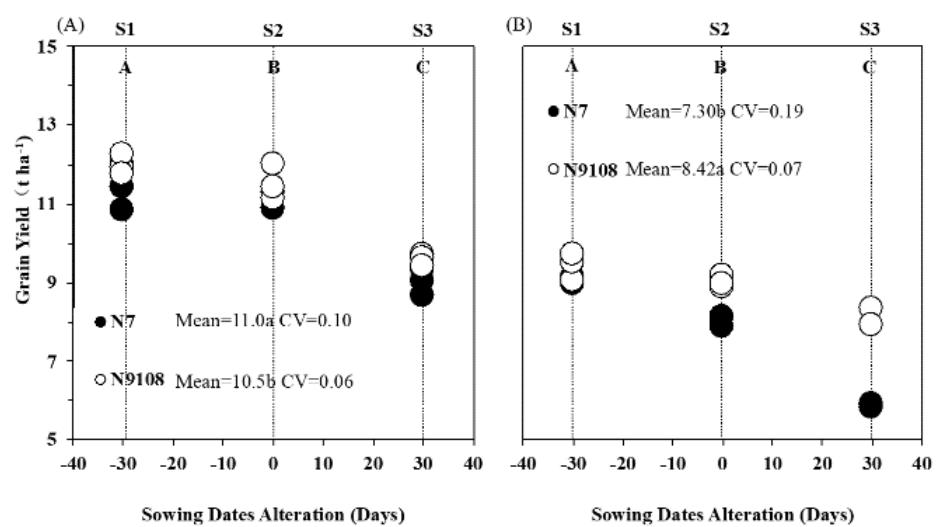

**Supplementary Figure S3.** Grain yield of two japonica rice varieties in 2019 (A) and 2020 (B).

**Supplementary Table S1.** Branching structure of panicles in different tiller positions under different sowing dates.

| Varieti | Treatme | Main Stem |         |      | Primary Tiller |         |      | Secondary Tiller |         |      | Tertiary Tiller |         |     |
|---------|---------|-----------|---------|------|----------------|---------|------|------------------|---------|------|-----------------|---------|-----|
|         |         | Mai       | Spikele | SG   | Prima          | Spikele | SG   | Seconda          | Spikele | SG   | Tertia          | Spikele | SG  |
| N7      | S1      | 20.3      | 178.1   | 55.6 | 44.4           | 135.1   | 51.9 | 21.4             | 113.3   | 36.3 | 13.9            | 89.3    | 36. |
|         | S2      | 25.5      | 181.8   | 57.1 | 45.9           | 140.1   | 56.8 | 20.9             | 114.3   | 40.1 | 7.7             | 90.1    | 42. |
|         | S3      | 33.4      | 180.3   | 56.7 | 53.3           | 138.4   | 59.1 | 13.3             | 109.6   | 41.4 | 0.0             | 0.0     | 0.0 |
|         | Mean    | 22.4      | 180.1   | 56.5 | 47.9           | 137.9   | 55.9 | 22.5             | 112.4   | 39.3 | 7.2             | 59.8    | 26. |
| N9108   | S1      | 23.4      | 174.7   | 51.3 | 36.3           | 139.4   | 49.8 | 22.8             | 128.1   | 36.7 | 12.8            | 91.3    | 31. |
|         | S2      | 26.7      | 177.4   | 50.9 | 45.5           | 141.7   | 52.2 | 20.1             | 130.1   | 36.2 | 7.7             | 87.6    | 33. |
|         | S3      | 33.1      | 173.4   | 48.9 | 56.2           | 138.7   | 52.3 | 17.7             | 124.8   | 41.2 | 0.0             | 0.0     | 0.0 |
|         | Mean    | 27.0      | 175.2   | 50.4 | 46.0           | 139.9   | 51.4 | 20.2             | 127.7   | 38.0 | 6.8             | 59.6    | 21. |
